# Supplementary material for: Molecular subtypes of colorectal cancer in pre-clinical models show differential response to targeted therapies: Treatment implications beyond KRAS mutations
Source: PubMed Central journal article supplement (PMC6097647; doi:10.1371/journal.pone.0200836), 2018-08-17

## **S2 File: Uncropped Western Blots / Raw Data for Figures 4 and 6**

SFig 4A\_B.1 p-ERBB2  
SFig 4A-B.2 ERBB2  
SFig 4A\_B.3 p-ERBB3  
SFig 4A\_B.4 ERBB3  
SFig 4A\_B.5 p-ERK  
SFig 4A\_B.6 ERK  
SFig 4A\_B.7 p-EGFR  
SFig 4A\_B.8 p-90RSK  
SFig 4A\_B.9 p-AKT  
SFig 4A\_B.10 AKT  
SFig 4A\_B.11 B-actin  
SFig 4C.1 p-ERBB2  
SFig 4C.2 ERBB2  
SFig 4C.3 p-ERBB3  
SFig 4C.4 ERBB3  
SFig 4C.5 p-ERK  
SFig 4C.6 ERK  
SFig 4C.7 p-EGFR  
SFig 4C.8 p-90RSK  
SFig 4C.9 p-AKT  
SFig 4C.10 AKT  
SFig 4C.11 B-actin  
SFig 6A.1 p-ERK  
SFig 6A.2 ERK  
SFig 6A.3 B-actin  
SFig 6C.1 p-ERK  
SFig 6C.2 ERK  
SFig 6C.3 B-actin

Figure 4A

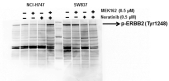

Figure 4B

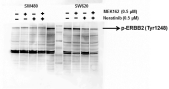

Figure 4A

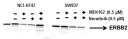

Figure 4B

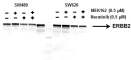

Figure 4A

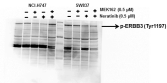

Figure 4B

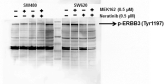

Figure 4A

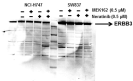

Figure 4B

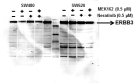

Figure 4A

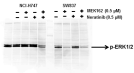

Figure 4B

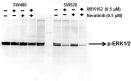

Figure 4A

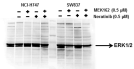

Figure 4B

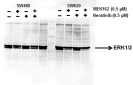

Figure 4A

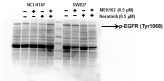

Figure 4B

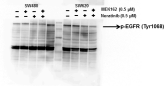



Figure 4A

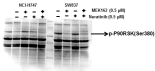

Figure 4B

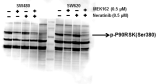

Figure 4A

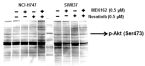

Figure 4B

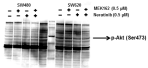

Figure 4A

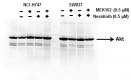

Figure 4B

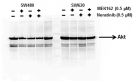

Figure 4A

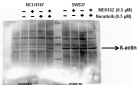

Figure 4B

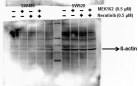

Figure 4C

| C26887 |   |   |   | Hs5787 |   |   |   | HCT-116 |   |   |   |                          |
|--------|---|---|---|--------|---|---|---|---------|---|---|---|--------------------------|
| -      | + | - | + | -      | + | - | + | -       | + | - | + | MEXH2 (0.5 $\mu$ M)      |
| -      | - | + | + | -      | - | + | + | -       | - | + | + | Marimastat (0.5 $\mu$ M) |

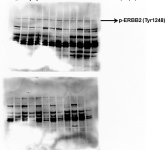

Figure 4C

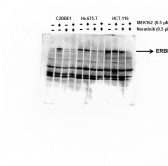

Figure 4C

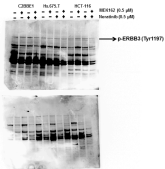

Figure 4C

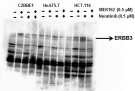



Figure 4C

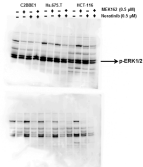

Figure 4C

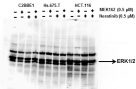

Figure 4C

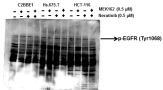

Figure 4C

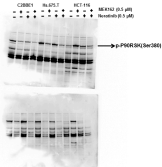

Figure 4C

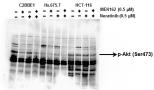

Figure 4C

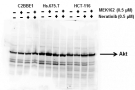

Figure 4C

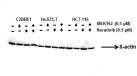

Figure 8A

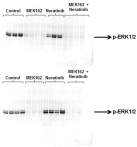



Figure 8A

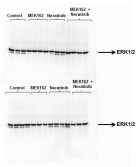

Figure 8A

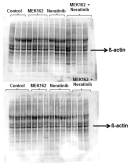

Figure 8C

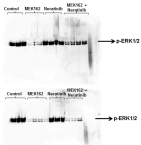

Figure 8C

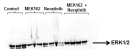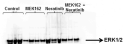

Figure 8C

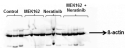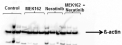

Supplement: pone.0200836.s014.pdf [file pone.0200836.s014.pdf]
